# Supplementary material for: Gaining insight into molecular tunnel junctions with a pocket calculator without I–V data fitting. Five-thirds protocol
Source: Royal Society of Chemistry journal article supplement (doi:10.1039/d4cp00217b), 2024-01-01

## —Electronic Supporting Information—

**Gaining insight into molecular tunnel junctions  
with a pocket calculator without  $I-V$  data fitting.**

**Five-thirds protocol**

Ioan Bâldea

*Theoretical Chemistry, Heidelberg University, Im  
Neuenheimer Feld 229, D-69120 Heidelberg,  
Germany. Fax: +49 6221 545221; Tel: +49 6221  
545219; E-mail: [ioan.baldea@pci.uni-heidelberg.de](mailto:ioan.baldea@pci.uni-heidelberg.de)*

**Practical guide for applying the five-thirds protocol**

**N.B.:** The numerical data underlying the figures presented below are included in the EXCEL file "[Simulation\\_Protocol\\_5by3.xlsx](#)" uploaded as additional ESI file.

# S1 Processing a smooth experimental I – V curve

Consider a smooth experimental curve

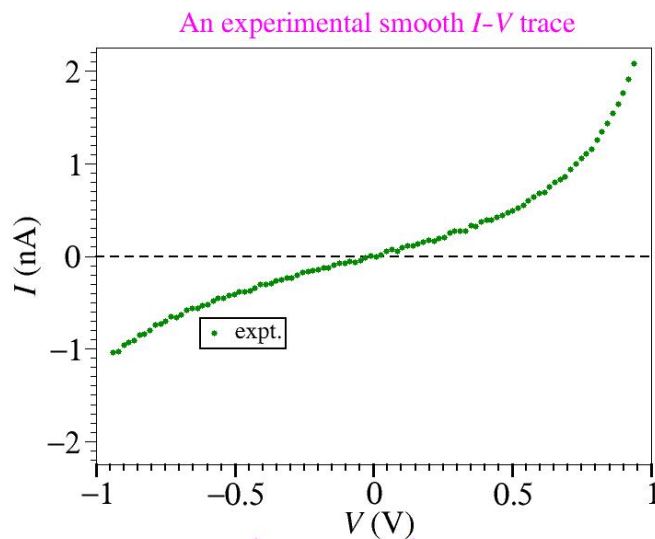

Recast the  $I - V$  curve as curve of  $V^{5/3}/I$  versus  $V$ . Notice the more pronounced noise exhibited by the curve of  $V^{5/3}/I$  versus  $V$

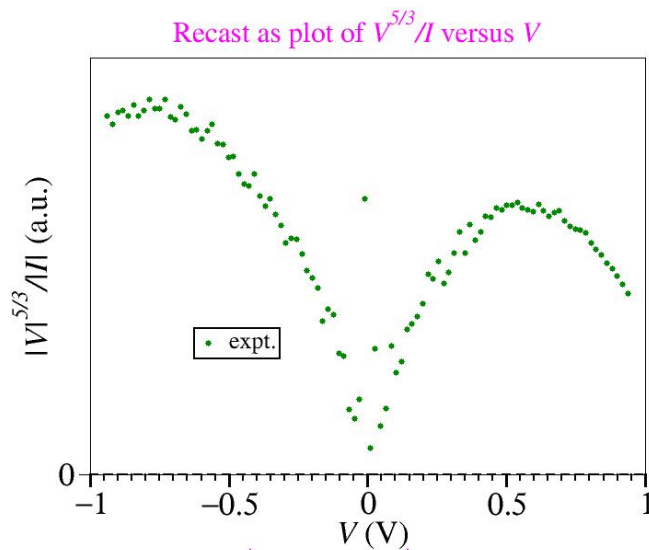

Determine the voltages  $V_{p+}$  and  $V_{p-}$  from the position of the peaks at positive and negative bias

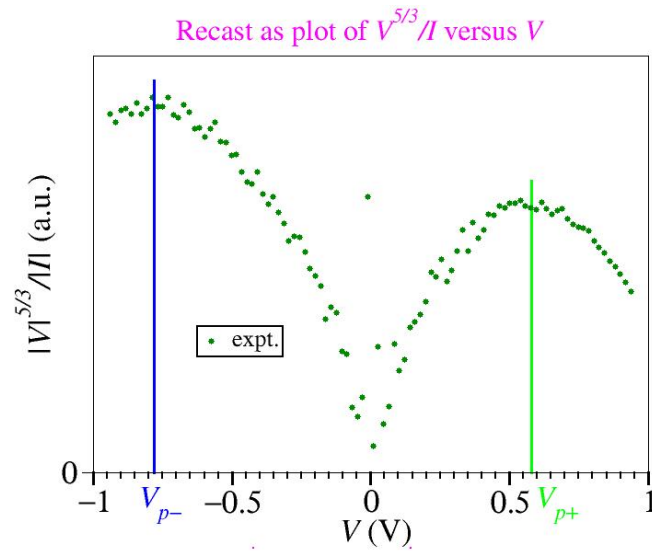

Return to the original  $I - V$  curve and determine the currents  $I_{p+}$  and  $I_{p-}$  corresponding to the voltages  $V_{p+}$  and  $V_{p-}$

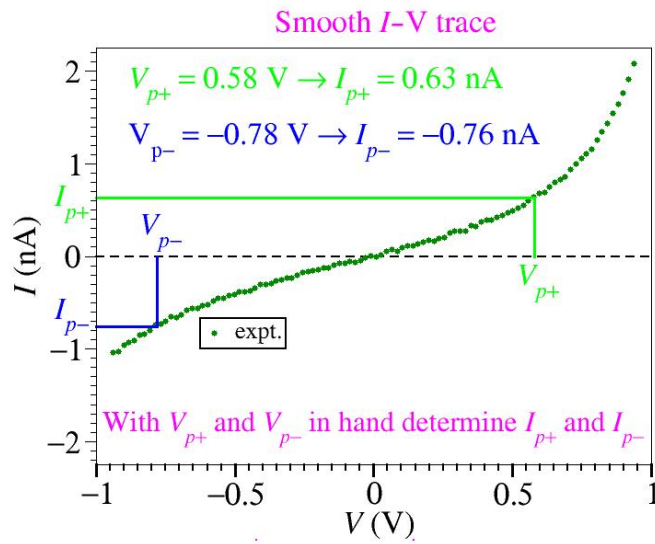

Plug the values  $V_{p+}$ ,  $V_{p-}$ ,  $I_{p+}$  and  $I_{p-}$  determined above into eqn (9) and obtain the parameters  $\epsilon_0$ ,  $\gamma$  and  $G$  characterizing the junction considered. Notice that the values obtained by applying the five-thirds protocol excellently agree with the values obtained by data fitting to eqn (1).

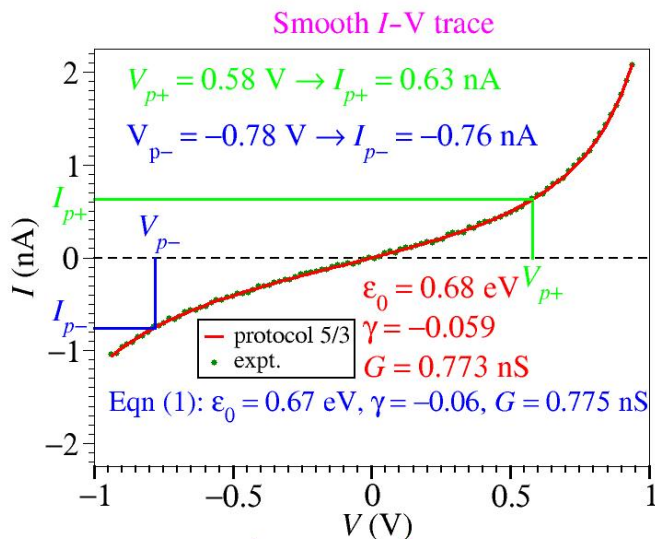

**Remark:** Noteworthy, despite the smoothness of the  $I - V$  curve considered, the value of the low bias estimates using the five-thirds protocol ( $G = 0.773 \text{ nS}$ ) is closer to the “most exact” value ( $G = 0.775 \text{ nS}$ ) obtained by data fitting to eqn (1) than the value extracted from the slope of the  $I - V$  curve deduced from linear fitting in the “low” bias range  $-0.1 \text{ V} \leq V \leq +0.1 \text{ V}$ .

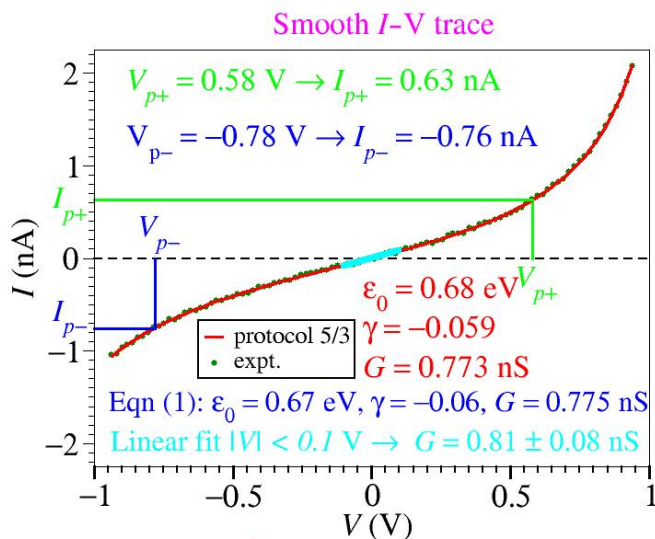

## S2 Processing a noisy experimental $I - V$ curve

Consider a noisy experimental  $I - V$  curve

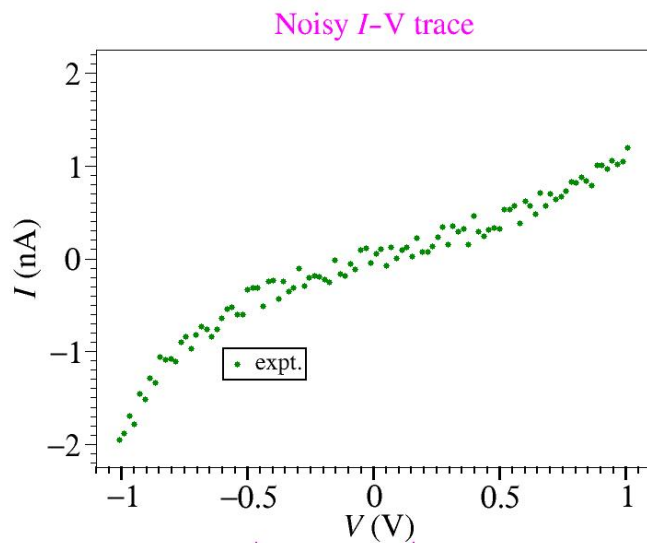

Recast it as curve of  $V^{5/3}/I$  versus  $V$

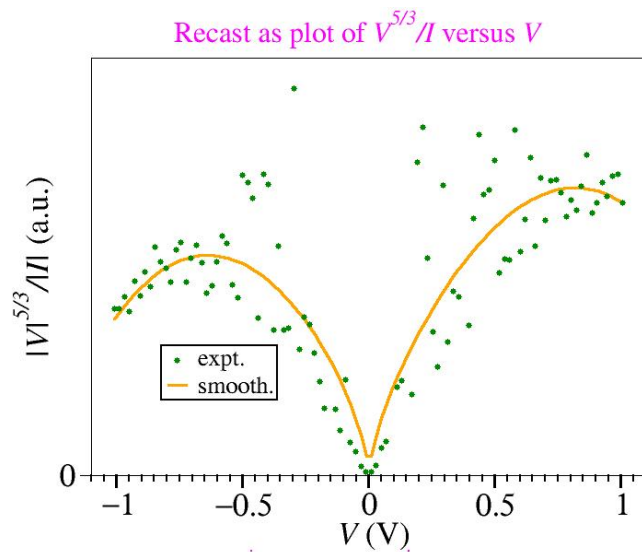

Determine the voltages  $V_{p+}$  and  $V_{p-}$  from the position of the peaks of the smoothed curve at positive and negative bias

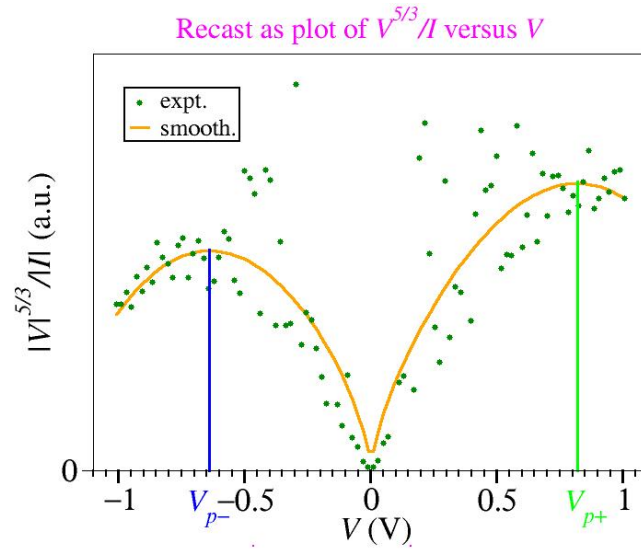

Return to the original  $I - V$  curve and determine the currents  $I_{p+}$  and  $I_{p-}$  corresponding to the voltages  $V_{p+}$  and  $V_{p-}$ . Use the smoothed curve to this aim

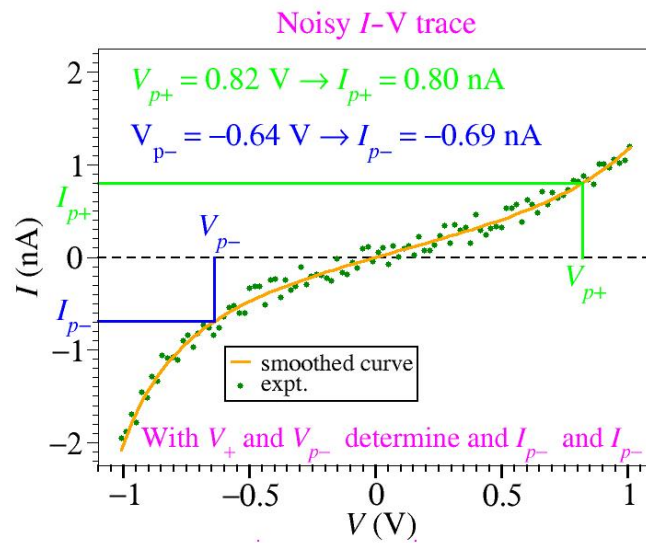

Plug the values  $V_{p+}$ ,  $V_{p-}$ ,  $I_{p+}$  and  $I_{p-}$  determined above into eqn (9) and obtain the parameters  $\epsilon_0$ ,  $\gamma$  and  $G$  characterizing the junction considered. Notice that the values obtained by applying the five-thirds protocol excellently agree with the values obtained by data fitting to eqn (1).

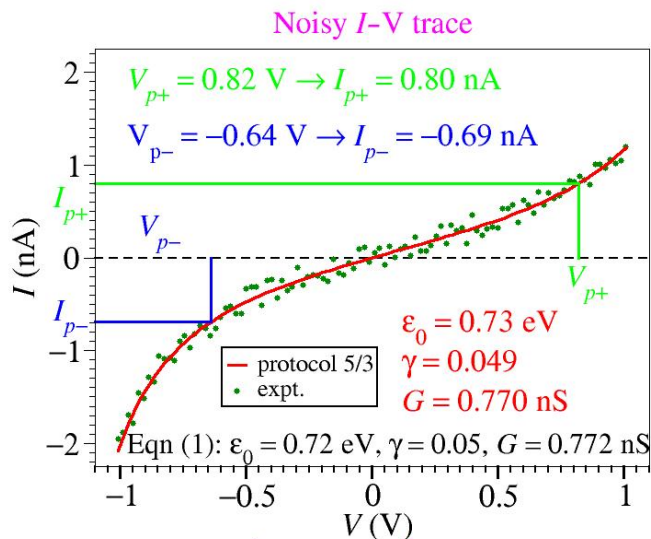

**Remark:** Notwithstanding the very pronounced noise exhibited by the experimental data, the value of the low bias conductance  $G$  estimated using the five-thirds protocol ( $G = 0.770 \text{ nS}$ ) is very closer to the “most exact” value ( $G = 0.772 \text{ nS}$ ) obtained by data fitting to eqn (1), while the value extracted from the slope of the  $I - V$  curve deduced from linear fitting in the “low” bias range  $-0.1 \text{ V} \leq V \leq +0.1 \text{ V}$  is very inaccurate.

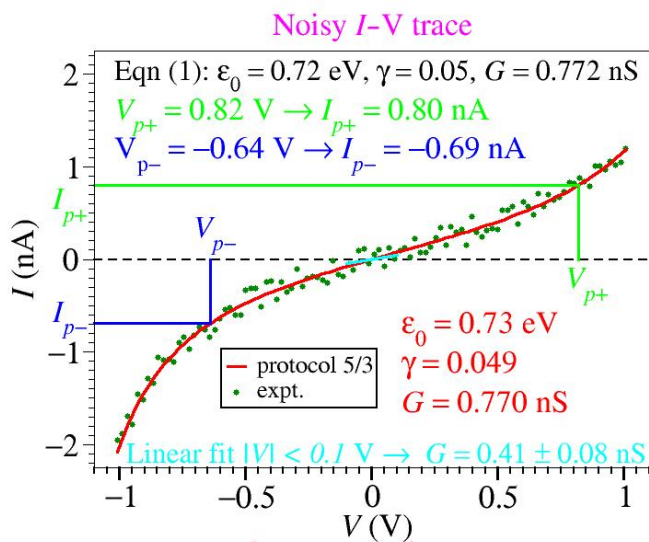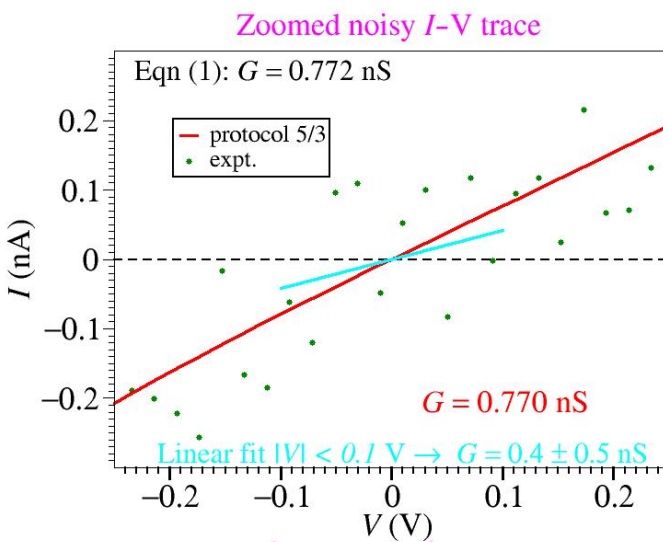

Supplement: d4cp00217b1.pdf [file d4cp00217b1.pdf]
