# Supplementary material for: Gaining insight into molecular tunnel junctions with a pocket calculator without I–V data fitting. Five-thirds protocol
Source: Royal Society of Chemistry journal article supplement (doi:10.1039/d4cp00217b), 2024-01-01
Supplement: d4cp00217b2.xlsx [file d4cp00217b2.xlsx]

## Sheet: Smooth I-V curve
5/3 Protocol	Vp+=0.58	Vp-=-0.78	Ip+=0.63	Ip-=-0.76
5/3 Protocol	e0=0.68	gamma=0.059	G=0.773
Fit	e0=0.67	gamma=-0.06	G=0.775
V		Iexp		Ismooth		V^(5/3)/Iexp		V^(5/3)/Ismooth
-0.938		-1.04567		-1.06088		0.859561		0.847237
-0.919051		-1.03567		-1.01584		0.838838		0.855213
-0.900101		-0.967223		-0.973333		0.867545		0.862099
-0.881152		-0.929058		-0.933133		0.871716		0.86791
-0.862202		-0.909354		-0.895034		0.858912		0.872654
-0.843253		-0.849932		-0.858856		0.885548		0.876347
-0.824303		-0.843415		-0.824437		0.859218		0.878997
-0.805354		-0.799017		-0.791631		0.87248		0.88062
-0.786404		-0.746005		-0.760308		0.89812		0.881225
-0.767455		-0.734486		-0.730351		0.875867		0.880826
-0.748505		-0.703653		-0.701654		0.876932		0.87943
-0.729556		-0.657554		-0.67412		0.899152		0.877056
-0.710606		-0.659945		-0.647661		0.857447		0.873709
-0.691657		-0.636155		-0.622199		0.850332		0.869405
-0.672707		-0.58573		-0.59766		0.881751		0.86415
-0.653758		-0.569705		-0.573978		0.864394		0.857959
-0.634808		-0.568658		-0.551091		0.824555		0.850839
-0.615859		-0.54007		-0.528942		0.82544		0.842806
-0.596909		-0.526362		-0.50748		0.80395		0.833863
-0.57796		-0.486379		-0.486656		0.824495		0.824026
-0.55901		-0.451849		-0.466426		0.839536		0.813298
-0.540061		-0.451572		-0.446748		0.79313		0.801694
-0.521111		-0.426318		-0.427583		0.791559		0.789217
-0.502162		-0.417579		-0.408896		0.759745		0.775878
-0.483212		-0.390657		-0.390651		0.761671		0.761682
-0.464263		-0.386463		-0.372818		0.720276		0.746638
-0.445313		-0.372759		-0.355367		0.696649		0.730744
-0.426364		-0.349444		-0.338268		0.691178		0.714014
-0.407414		-0.310868		-0.321496		0.720251		0.696441
-0.388465		-0.309862		-0.305026		0.667449		0.678031
-0.369515		-0.296263		-0.288832		0.642258		0.658782
-0.350566		-0.263436		-0.272893		0.661619		0.638691
-0.331616		-0.254671		-0.257185		0.623849		0.617751
-0.312667		-0.240924		-0.241689		0.597847		0.595955
-0.293717		-0.234061		-0.226383		0.55448		0.573286
-0.274768		-0.204839		-0.211248		0.566932		0.549732
-0.255818		-0.182823		-0.196266		0.563881		0.525259
-0.236869		-0.171886		-0.181416		0.527562		0.499848
-0.217919		-0.161138		-0.166683		0.489734		0.473442
-0.19897		-0.144099		-0.152047		0.4706		0.446
-0.18002		-0.128702		-0.137492		0.445946		0.417437
-0.161071		-0.129813		-0.123001		0.36732		0.387662
-0.142121		-0.0975307		-0.108556		0.396846		0.356541
-0.123172		-0.0797589		-0.0941406		0.382303		0.323899
-0.104222		-0.0794715		-0.0797384		0.290439		0.289466
-0.0852727		-0.0583998		-0.0653323		0.282882		0.252865
-0.0663232		-0.0696179		-0.0509055		0.156095		0.213474
-0.0473737		-0.0467912		-0.0364409		0.132556		0.170205
-0.0284242		-0.0147171		-0.0219212		0.179884		0.120767
-0.00947475		0.000641591		-0.00732896		0.661233		0.0578856
0.00947475		-0.00679393		0.00735388		0.0624442		0.0576894
0.0284242		0.0088048		0.0221457		0.300673		0.119543
0.0473737		0.0531174		0.0370653		0.116768		0.167338
0.0663232		0.0686514		0.0521324		0.158292		0.20845
0.0852727		0.0537487		0.0673671		0.307361		0.245227
0.104222		0.0944714		0.0827904		0.244324		0.278795
0.123172		0.112717		0.0984244		0.270519		0.309802
0.142121		0.11113		0.114292		0.348283		0.338648
0.161071		0.132029		0.130417		0.361154		0.365618
0.18002		0.152106		0.146825		0.37733		0.390902
0.19897		0.165708		0.163544		0.409232		0.414647
0.217919		0.164677		0.1806		0.47921		0.436959
0.236869		0.193207		0.198026		0.469344		0.457922
0.255818		0.201705		0.215852		0.511095		0.477598
0.274768		0.253883		0.234113		0.457415		0.496042
0.293717		0.268542		0.252846		0.483285		0.513286
0.312667		0.271505		0.272092		0.530508		0.529364
0.331616		0.273288		0.291892		0.581351		0.544298
0.350566		0.328284		0.312293		0.530925		0.558111
0.369515		0.317769		0.333345		0.598791		0.570812
0.388465		0.367815		0.355103		0.562286		0.582414
0.407414		0.385452		0.377625		0.580884		0.592924
0.426364		0.390958		0.400977		0.617785		0.602349
0.445313		0.420645		0.425229		0.617343		0.610688
0.464263		0.435205		0.450461		0.639607		0.617945
0.483212		0.469481		0.476757		0.633789		0.624117
0.502162		0.491947		0.504213		0.644894		0.629205
0.521111		0.52223		0.532935		0.646183		0.633203
0.540061		0.548691		0.56304		0.652745		0.63611
0.55901		0.593832		0.594658		0.638806		0.637919
0.57796		0.632007		0.627938		0.634514		0.638625
0.596909		0.672932		0.663044		0.628843		0.638221
0.615859		0.68912		0.700162		0.646905		0.636703
0.634808		0.742544		0.739503		0.631464		0.634061
0.653758		0.79496		0.781309		0.619464		0.630288
0.672707		0.824108		0.825855		0.626699		0.625373
0.691657		0.855692		0.873456		0.63217		0.619313
0.710606		0.931051		0.924477		0.607773		0.612095
0.729556		0.993027		0.979344		0.595392		0.603711
0.748505		1.0494		1.03855		0.588008		0.594151
0.767455		1.10014		1.10268		0.584755		0.583408
0.786404		1.15694		1.17243		0.579116		0.571465
0.805354		1.25613		1.24861		0.554979		0.558322
0.824303		1.34568		1.33222		0.538521		0.543962
0.843253		1.42848		1.42447		0.526893		0.528376
0.862202		1.54226		1.52683		0.506435		0.511553
0.881152		1.64176		1.64113		0.493297		0.493486
0.900101		1.76291		1.76968		0.47598		0.474159
0.919051		1.90422		1.9154		0.456228		0.453565
0.938		2.07348		2.08208		0.433482		0.431692

## Sheet: Noisy I-V curve
5/3 Protocol	Vp+=0.82	Vp-=-0.64	Ip+=0.80	Ip-=-0.69
5/3 Protocol	e0=0.73	gamma=0.049G=0.770
Fit	e0=0.72	gamma=0.05	G=0.772
V		Iexp		Ismooth		V^(5/3)/Iexp		V^(5/3)/Ismooth
-1.008		-1.95223		-2.08322		0.519083		0.486444
-0.987636		-1.88724		-1.92688		0.519		0.508323
-0.967273		-1.70292		-1.7888		0.555547		0.528875
-0.946909		-1.78706		-1.66589		0.510946		0.54811
-0.926545		-1.45737		-1.55574		0.604238		0.566031
-0.906182		-1.51707		-1.45638		0.559354		0.582663
-0.885818		-1.29044		-1.36626		0.633145		0.598009
-0.865455		-1.34171		-1.2841		0.585799		0.612081
-0.845091		-1.06367		-1.20884		0.710175		0.62489
-0.824727		-1.09352		-1.13961		0.66327		0.636445
-0.804364		-1.07724		-1.07566		0.645816		0.646764
-0.784		-1.10847		-1.01638		0.601362		0.655849
-0.763636		-0.907692		-0.961229		0.702865		0.663718
-0.743273		-0.841167		-0.909762		0.725045		0.670378
-0.722909		-0.967943		-0.861586		0.601575		0.675835
-0.702545		-0.82137		-0.816361		0.675955		0.680103
-0.682182		-0.738322		-0.773793		0.716014		0.683191
-0.661818		-0.759953		-0.733623		0.66137		0.685106
-0.641455		-0.841533		-0.695625		0.566943		0.685859
-0.621091		-0.76591		-0.659599		0.590311		0.685455
-0.600727		-0.643038		-0.625366		0.665108		0.683903
-0.580364		-0.542595		-0.592769		0.744203		0.681211
-0.56		-0.527418		-0.561667		0.721371		0.677383
-0.539636		-0.604046		-0.531934		0.59215		0.672425
-0.519273		-0.608307		-0.503455		0.551489		0.666345
-0.498909		-0.3363		-0.476129		0.933201		0.65914
-0.478545		-0.320993		-0.449862		0.9121		0.650817
-0.458182		-0.315541		-0.424571		0.862994		0.641377
-0.437818		-0.51589		-0.400178		0.489327		0.630816
-0.417455		-0.24872		-0.376615		0.937502		0.619135
-0.397091		-0.236729		-0.353815		0.906216		0.606327
-0.376727		-0.435369		-0.331722		0.451357		0.592384
-0.356364		-0.250886		-0.310281		0.71397		0.5773
-0.336		-0.358367		-0.289441		0.453145		0.561055
-0.315636		-0.320106		-0.269157		0.457106		0.543632
-0.295273		-0.108757		-0.249385		1.20388		0.525012
-0.274909		-0.29572		-0.230087		0.393038		0.505153
-0.254545		-0.207643		-0.211223		0.492369		0.484023
-0.234182		-0.189109		-0.192761		0.470483		0.461569
-0.213818		-0.201653		-0.174666		0.379142		0.437722
-0.193455		-0.223007		-0.156908		0.290167		0.412403
-0.173091		-0.257311		-0.139458		0.208929		0.385491
-0.152727		-0.0164809		-0.122289		2.64776		0.356839
-0.132364		-0.167112		-0.105374		0.20572		0.326249
-0.112		-0.185045		-0.0886883		0.140633		0.293425
-0.0916364		-0.0626338		-0.0722084		0.297375		0.257944
-0.0712727		-0.120837		-0.0559112		0.101392		0.219132
-0.0509091		0.0951536		-0.0397748		0.0734909		0.175813
-0.0305455		0.108676		-0.0237781		0.0274649		0.125526
-0.0101818		-0.0493198		-0.00790044		0.00969809		0.0605419
0.0101818		0.052438		0.00787812		0.0091214		0.0607135
0.0305455		0.0989208		0.0235771		0.0301734		0.126596
0.0509091		-0.0830202		0.0392156		0.0842316		0.17832
0.0712727		0.116957		0.0548125		0.104756		0.223525
0.0916364		-0.00266379		0.0703862		6.99219		0.264622
0.112		0.094808		0.0859553		0.274485		0.302755
0.132364		0.116639		0.101538		0.29474		0.338575
0.152727		0.0235526		0.117153		1.85277		0.372483
0.173091		0.214918		0.132818		0.250141		0.404763
0.193455		0.066376		0.148551		0.97489		0.435603
0.213818		0.070582		0.164373		1.08321		0.465132
0.234182		0.13136		0.180301		0.677318		0.493467
0.254545		0.229454		0.196354		0.445566		0.520676
0.274909		0.343636		0.212553		0.338233		0.546824
0.295273		0.145035		0.228918		0.902748		0.571952
0.315636		0.352681		0.24547		0.414886		0.596091
0.336		0.284127		0.26223		0.571548		0.619274
0.356364		0.3218		0.27922		0.556635		0.641519
0.376727		0.149486		0.296464		1.31455		0.662836
0.397091		0.458568		0.313987		0.467821		0.683238
0.417455		0.291672		0.331812		0.799444		0.702734
0.437818		0.23784		0.349968		1.06138		0.72132
0.458182		0.311432		0.368482		0.87438		0.739005
0.478545		0.330044		0.387384		0.887087		0.755782
0.498909		0.32006		0.406705		0.980552		0.771654
0.519273		0.531839		0.426478		0.630782		0.786616
0.539636		0.531083		0.446738		0.673502		0.800661
0.56		0.566959		0.467524		0.671061		0.813785
0.580364		0.375863		0.488875		1.07433		0.82598
0.600727		0.614329		0.510835		0.69619		0.837236
0.621091		0.56724		0.53345		0.797062		0.847549
0.641455		0.482641		0.556771		0.988521		0.856907
0.661818		0.705928		0.580851		0.711985		0.865299
0.682182		0.5713		0.605748		0.925343		0.87272
0.702545		0.70005		0.631527		0.7931		0.879154
0.722909		0.633936		0.658256		0.918531		0.884595
0.743273		0.662514		0.68601		0.92056		0.889031
0.763636		0.724373		0.714873		0.880741		0.892446
0.784		0.829087		0.744933		0.804007		0.894835
0.804364		0.813058		0.776291		0.855657		0.896183
0.824727		0.877312		0.809055		0.826729		0.896477
0.845091		0.840241		0.843346		0.899018		0.895708
0.865455		0.788448		0.879299		0.996861		0.893863
0.885818		1.00061		0.917062		0.816537		0.890927
0.906182		1.00086		0.956802		0.84785		0.886891
0.926545		0.964755		0.998704		0.912768		0.88174
0.946909		1.05045		1.04298		0.869237		0.875463
0.967273		1.01527		1.08986		0.931823		0.868049
0.987636		1.04425		1.13961		0.937973		0.859486
1.008		1.1956		1.19255		0.847582		0.84975
